# Supplementary material
Source: publisher site journal article supplement (https://study.sagepub.com/sites/default/files/appendix_1a.pdf)
Supplement: Supplementary file 1 [file appendix_1a.pdf]

### Single Word Reading Test: Primary Example

This should only be used **after** the assessment of the first 100 words suggested in Letters and Sounds has been made.

|        |         |       |       |       |
|--------|---------|-------|-------|-------|
| school | there   | said  | day   | have  |
| saw    | people  | one   | what  | good  |
|        |         |       |       |       |
| right  | door    | key   | still | want  |
| please | thought | horse | come  | would |
| cried  | etc.    |       |       |       |

### Single Word Reading Test: Secondary Example

|          |           |         |            |          |
|----------|-----------|---------|------------|----------|
| park     | said      | where   | new        | would    |
| cold     | any       | every   | took       | other    |
|          |           |         |            |          |
| print    | soft      | fine    | shelter    | thought  |
| vain     | planet    | source  | method     | triangle |
|          |           |         |            |          |
| climate  | record    | present | asked      | practice |
| answer   | science   | global  | change     | model    |
|          |           |         |            |          |
| addition | recognise | system  | experiment | etc.     |

**Notes:** We suggest about 50 words (maximum).

Unless there is comparison across an age group, this information, while perhaps indicating how a learner fares when meeting these words, is of limited use diagnostically.

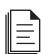

**Photocopiable**

*Assessment of Learners with Dyslexic-Type Difficulties 2e* © 2018 Sylvia Phillips and Kathleen Kelly (Sage: London).
